# Supplementary material for: Hemp sprout-derived exosome-like nanovesicles as hepatoprotective agents attenuate liver fibrosis
Source: Royal Society of Chemistry journal article supplement (doi:10.1039/d4bm00812j), 2024-01-01

**Figure 4. B**

**TGF- $\beta$**

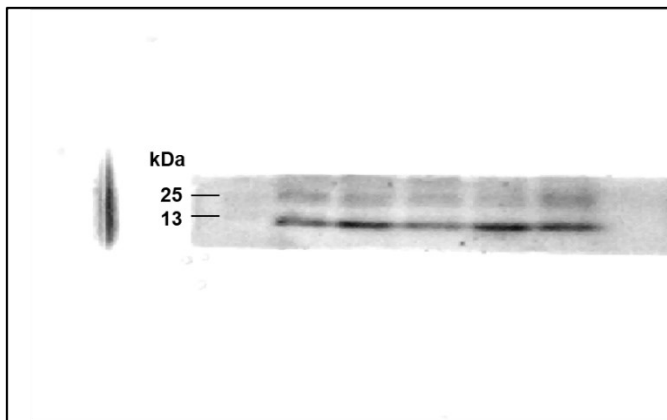

**$\alpha$ -SMA**

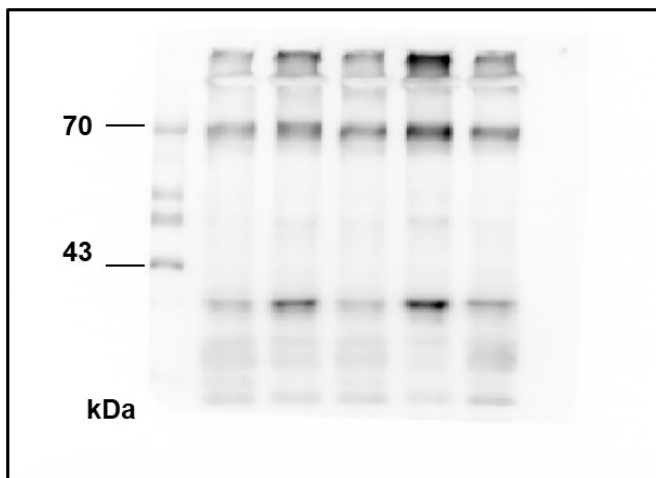

### Pro collagen-1

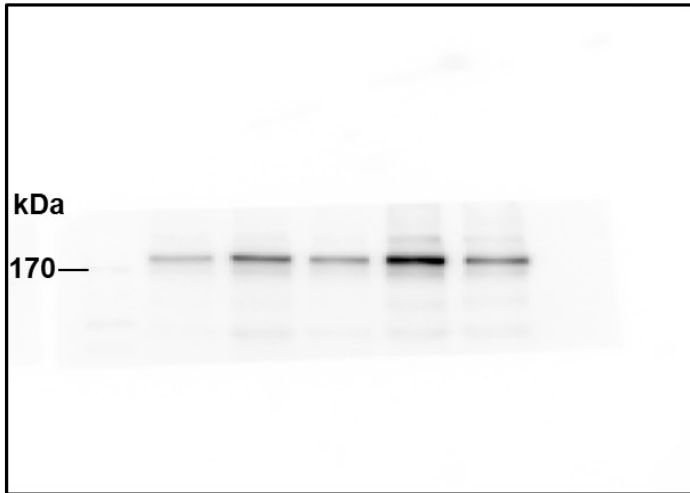

### Collagen-1

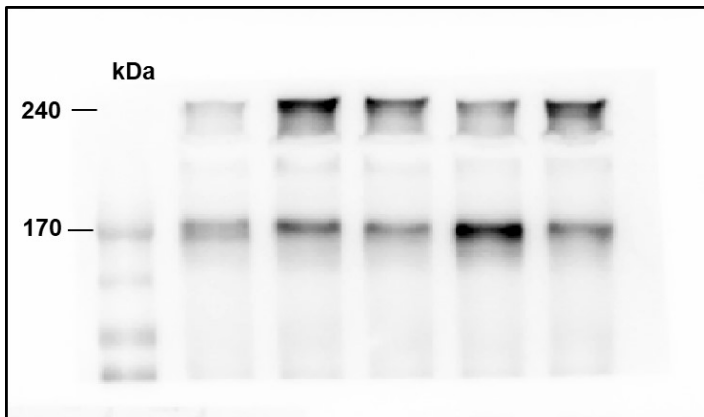

**MMP2**

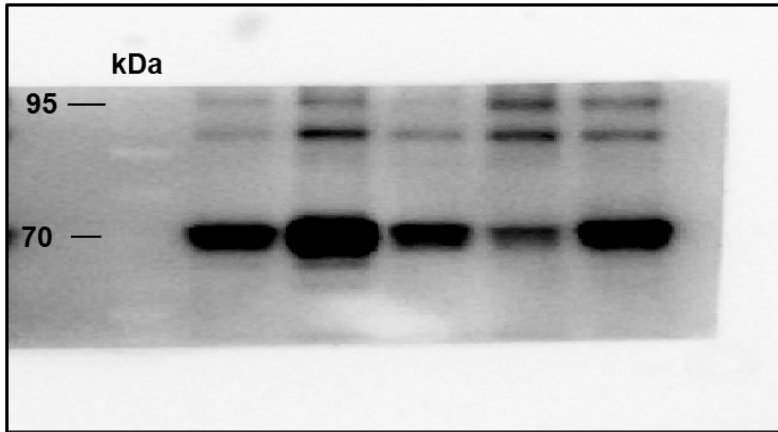

**MMP9**

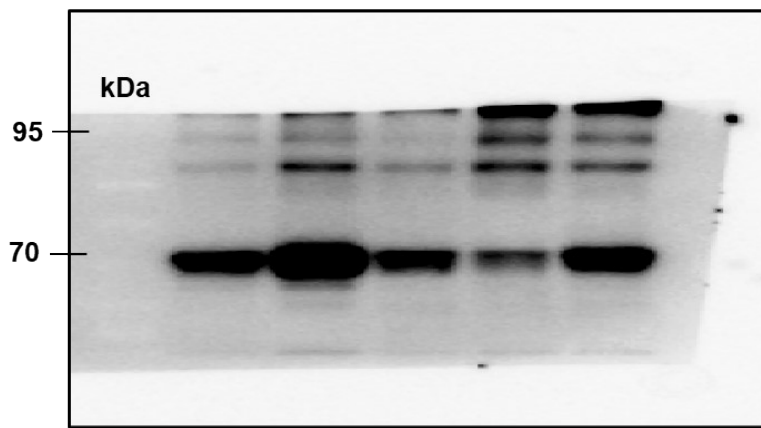

**GAPDH**

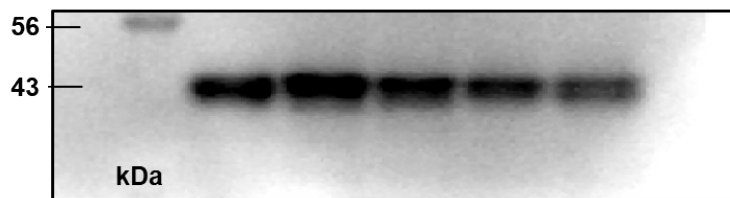

**Figure 4. C**

**P-AMPK**

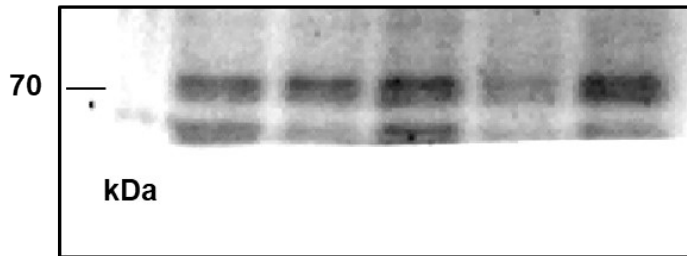

**SREBP-1**

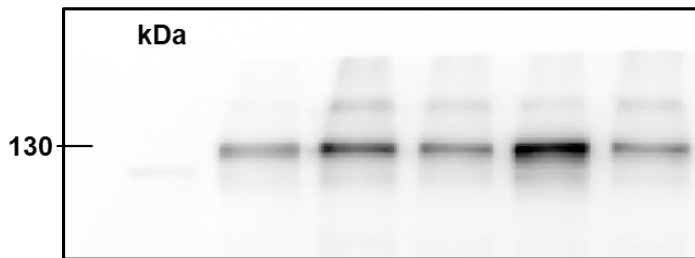

**GAPDH**

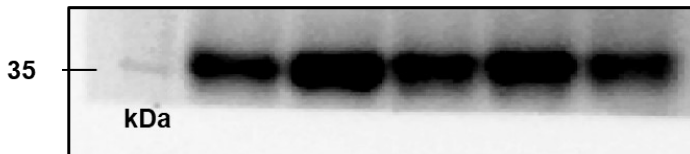

**Figure 5. C**

**$\alpha$ -SMA**

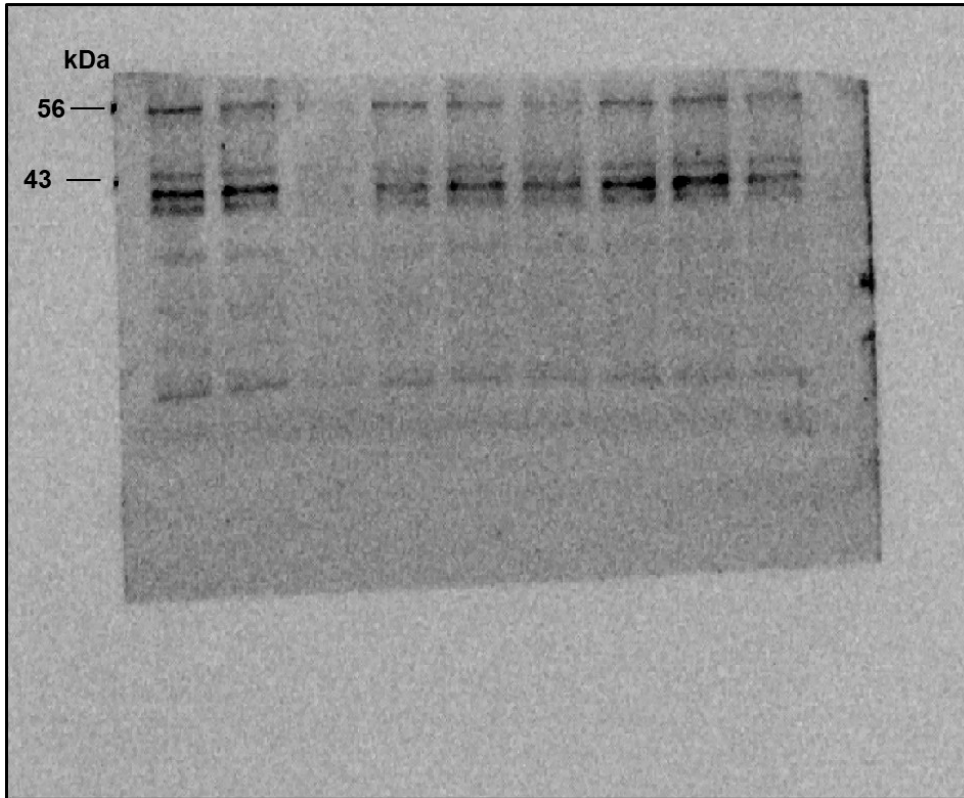

**Pro collagen-1**

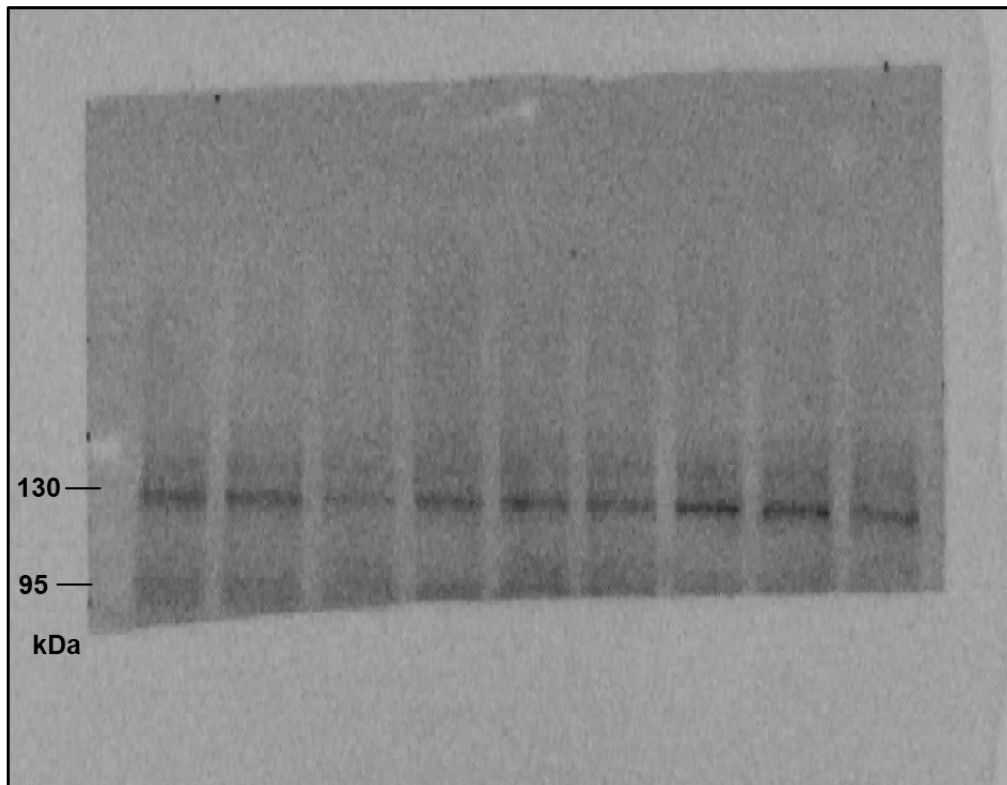

**collagen-1**

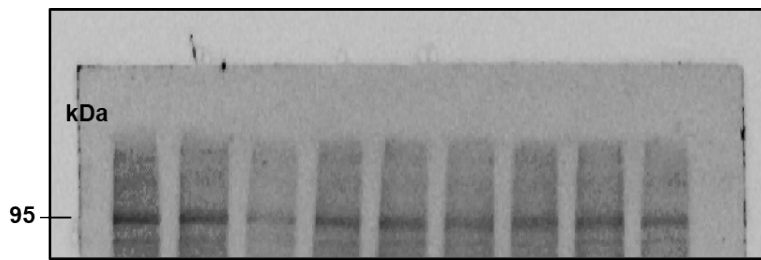

**GAPDH**

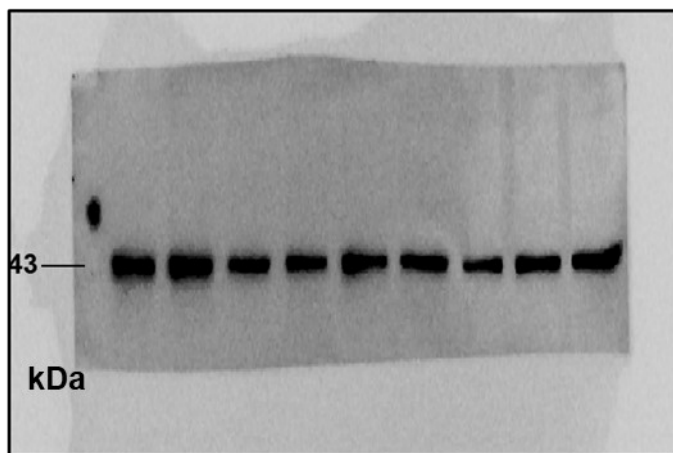

**Figure 5. D**

**MMP-2**

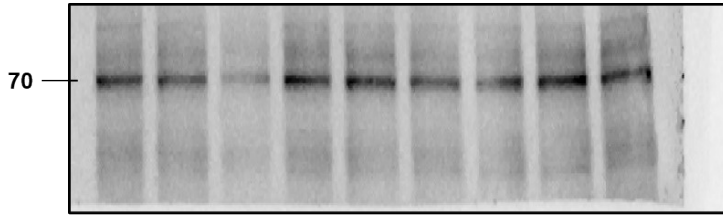

**MMP9**

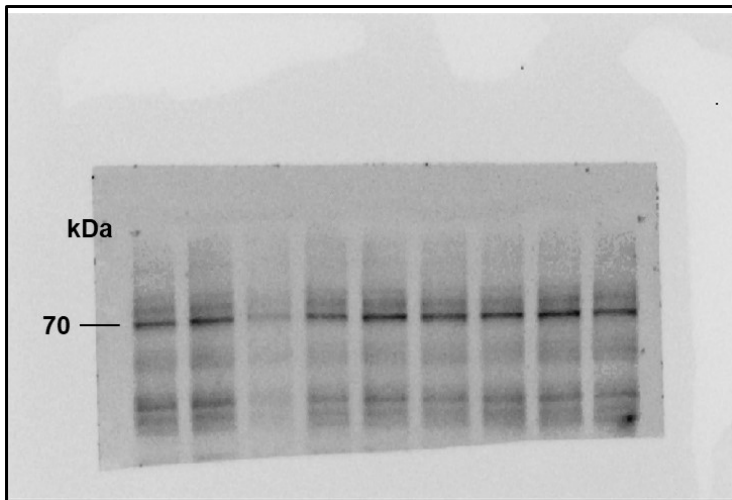

**TGF- $\beta$**

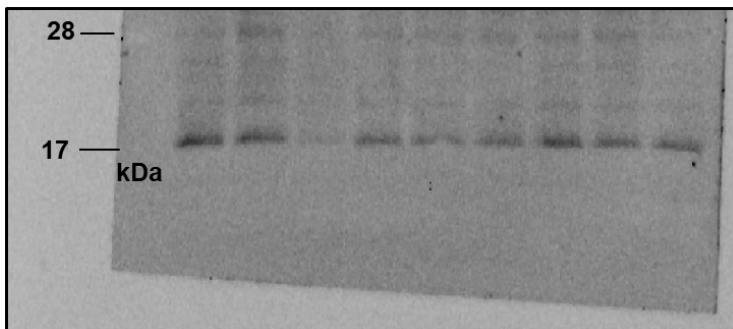



**GAPDH**

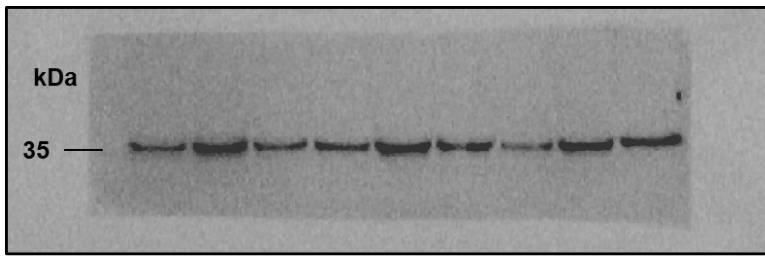

**Figure 6. C**

**ZO-1**

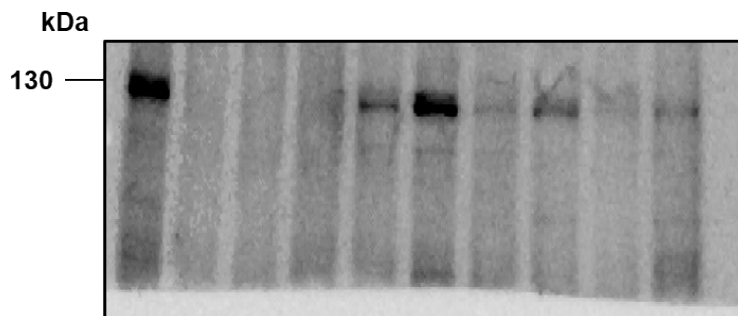

**Occludin**

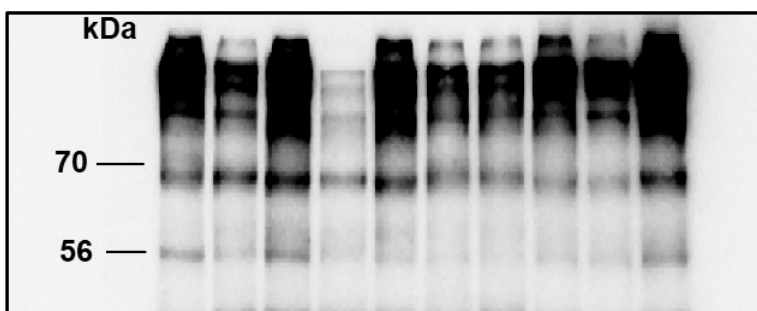

**GAPDH**

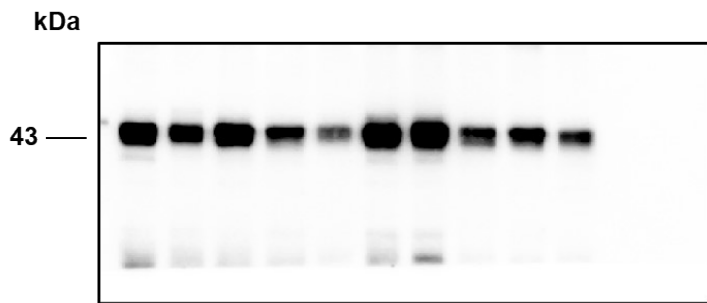

**Figure 6. D**

**E-cadherin**

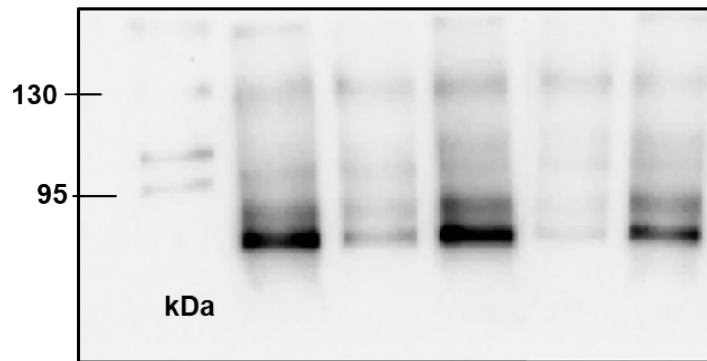

**$\beta$ -catenin**

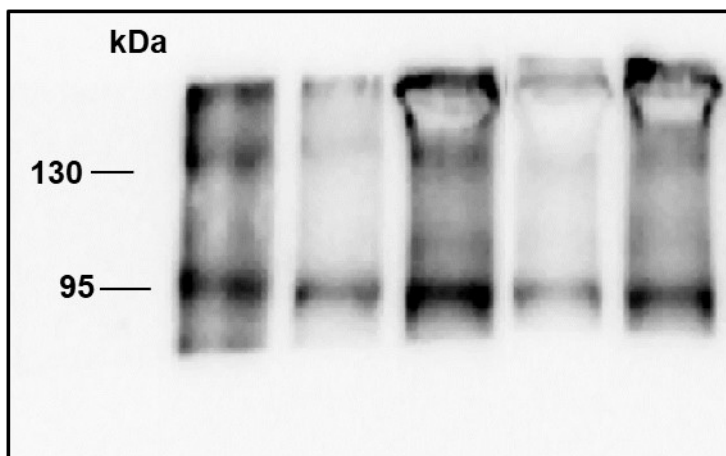

**$\alpha$ -tubulin**

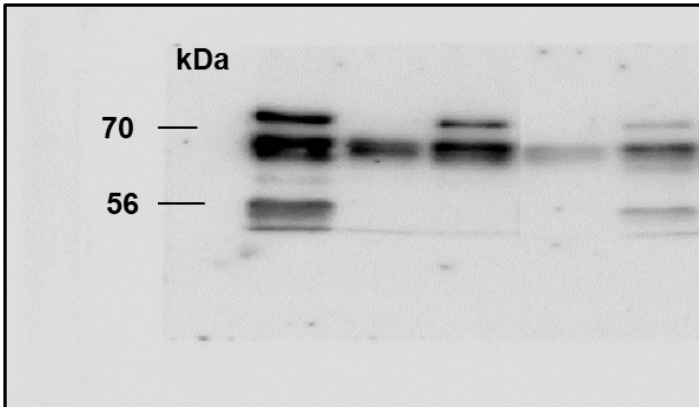

**GAPDH**

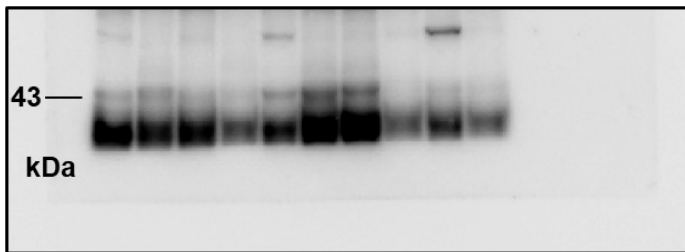

Supplement: d4bm00812j1.pdf [file d4bm00812j1.pdf]
