# Supplementary material for: Hemp sprout-derived exosome-like nanovesicles as hepatoprotective agents attenuate liver fibrosis
Source: Royal Society of Chemistry journal article supplement (doi:10.1039/d4bm00812j), 2024-01-01
Supplement: d4bm00812j2.pdf [file d4bm00812j2.pdf]

## Hemp sprout-derived exosomes-like nanovesicles as hepatoprotective agent attenuate liver fibrosis

Ji-Su Kim <sup>a,1</sup>, Jung-Young Eom <sup>a,b,1</sup>, Hyun-Woo Kim <sup>b</sup>, Je-Won Ko <sup>c</sup>, Eui-Ju Hong <sup>c</sup>, Mun-Nyeon

Kim <sup>d</sup>, Jihoon Kim <sup>e</sup>, Do-Kyun Kim <sup>b\*\*\*</sup>, Hyo-Jung Kwon <sup>c\*\*</sup>, and Young-Eun Cho <sup>a\*</sup>

<sup>a</sup> Department of Food and Nutrition, Andong National University, Andong 1375, South Korea

<sup>b</sup> Korea Zoonosis Research Institute, Jeonbuk National University, Iksan 54531, South Korea

<sup>c</sup> Department of Veterinary Pathology, College of Veterinary Medicine, Chungnam National University, Daejeon 34134, South Korea

<sup>d</sup> Hempgropharm company, Andong 1439-2, South Korea

<sup>e</sup> School of Integrative Engineering, Chung-Ang University, Seoul 06974, South Korea

\* Corresponding authors. Department of Food and Nutrition, Andong National University, Andong1375, South Korea.

\*\* Corresponding authors. Department of Veterinary Pathology, College of Veterinary Medicine, Chungnam National University, Daejeon 34134, South Korea.

\*\*\* Corresponding authors. Korea Zoonosis Research Institute, Jeonbuk National University, Iksan 54531, South Korea.

E-mail addresses: [dkkim714@jbnu.ac.kr](mailto:dkkim714@jbnu.ac.kr) (Do-Kyun Kim), [hyojung@cnu.ac.kr](mailto:hyojung@cnu.ac.kr) (Hyo-Jung Kwon), [yecho@anu.ac.kr](mailto:yecho@anu.ac.kr) (Young-Eun Cho).

<sup>1</sup> These authors contributed equally to this article

**Table S1. The primary antibodies used in immunoblotting analyses.**

|                         | <b>Antibody</b>   | <b>Dilution Factor</b> | <b>Corporation</b> | <b>Catalouge number</b> | <b>Clone</b> |
|-------------------------|-------------------|------------------------|--------------------|-------------------------|--------------|
| <b>Primary antibody</b> |                   |                        |                    |                         |              |
|                         | TLR4              | 1:5,000                | Abcam              | ab22048                 | Mouse        |
|                         | 3NT               | 1:5,000                | Abcam              | ab61392                 | Mouse        |
|                         | ZO-1              | 1:5,000                | Abcam              | #5406                   | Rabbit       |
|                         | Occludin          | 1:1,000                | Santa Cruz         | sc-271842               | Mouse        |
|                         | E-cadherin        | 1:1,000                | Santa Cruz         | sc-8426                 | Mouse        |
|                         | $\beta$ -catenin  | 1:1,000                | Santa Cruz         | sc-7963                 | Mouse        |
|                         | $\alpha$ -tubulin | 1:1,000                | Santa Cruz         | sc-5286                 | Mouse        |
|                         | TGF               | 1:1,000                | Santa Cruz         | sc130348                | Mouse        |
|                         | $\alpha$ -SMA     | 1:5,000                | Sigma-Aldrich      | A5228                   | Mouse        |
|                         | Pro collagen-1    | 1:1,000                | Santa Cruz         | sc-166572               | Mouse        |
|                         | Collagen-1        | 1:1,000                | Santa Cruz         | sc59772                 | Mouse        |
|                         | MMP2              | 1:1,000                | Santa Cruz         | sc-10736                | Rabbit       |
|                         | MMP9              | 1:1,000                | Santa Cruz         | sc-21733                | Mouse        |
|                         | P-AMPK            | 1:1,000                | Merck              | #07-681                 | Rabbit       |
|                         | SREBP-1           | 1:1,000                | Santa Cruz         | sc-13551                | Mouse        |
|                         | GAPDH             | 1:1,000                | Santa Cruz         | sc-47724                | Mouse        |

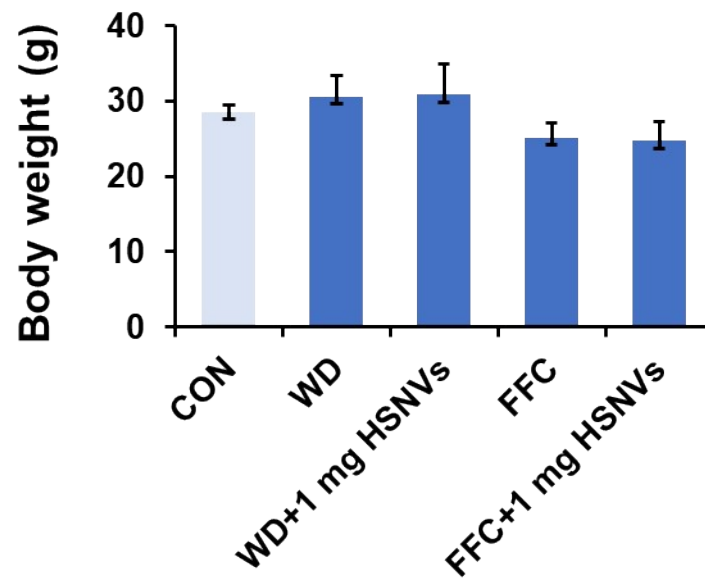

**Fig. S1.** HSNVs treatment unchanged body weight in NADLD mouse models such as WD and FFC. There is no significant difference between groups.

## Adipose histology stained

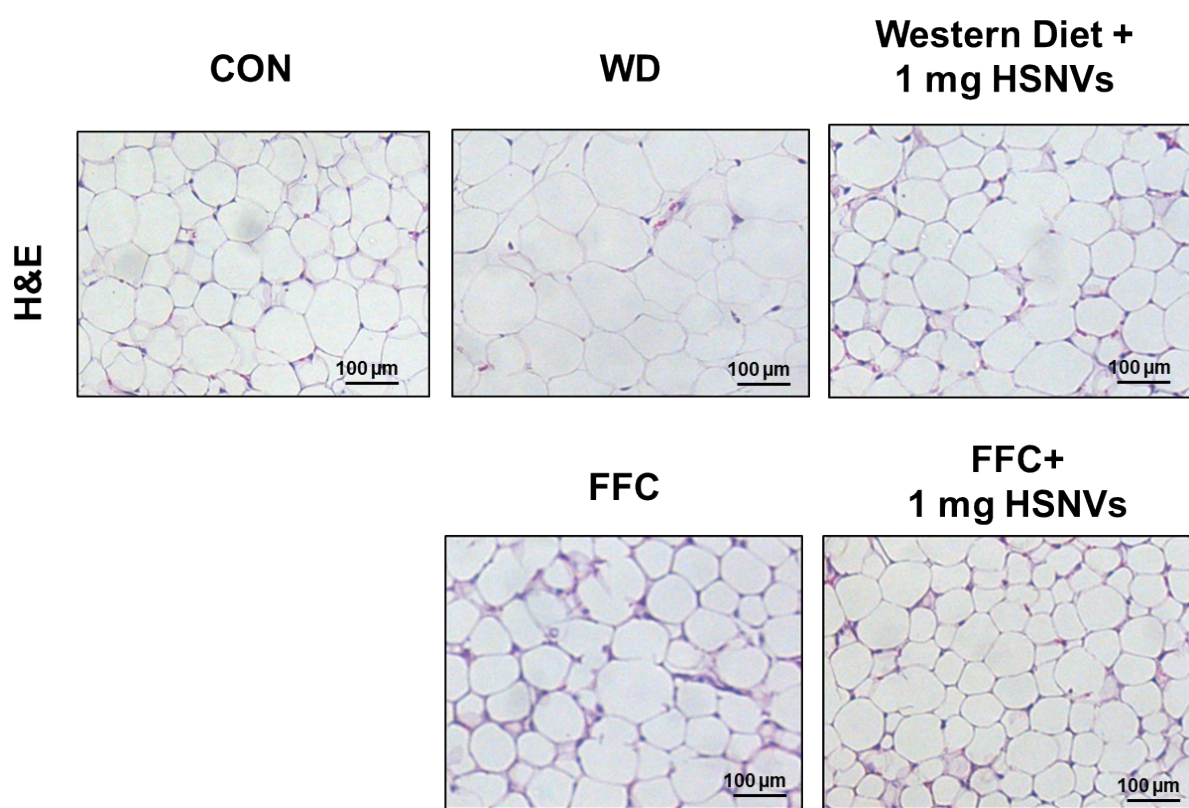

**Fig. S2.** HSNVs treatment attenuated NAFLD-induced adipose inflammation in mice. Representative adipose image and H&E of formalin-fixed adipose sections for CON, WD, WD+1 mg HSNVs, FFC, and FFC+ 1mg HSNVs treatments.

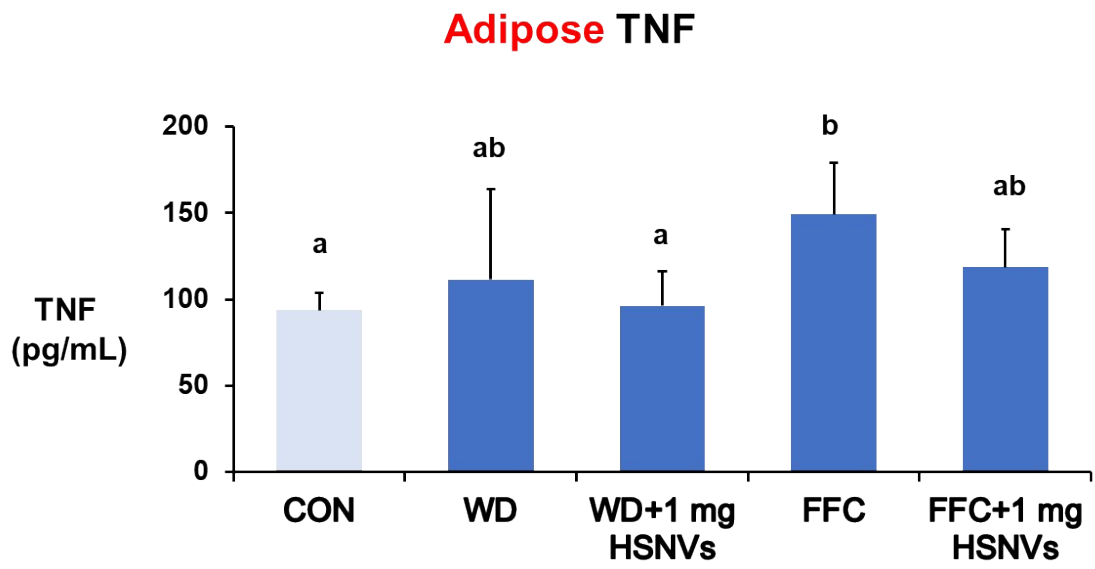

**Fig. S3.** HSNVs treatment reduced TNF in NAFLD-induced adipose inflammation in mice.
